# Supplementary material for: A foehn-induced haze front in Beijing: observations and implications
Source: Copernicus journal article supplement (doi:10.5194/acp-2020-720), 2020-08-24
Supplement: Supplementary file 1 [file acp-2020-720-supplement.pdf]

*Supplement of*

A foehn-induced haze front in Beijing: observations and implications

Li et al.

*Correspondence to* : Ju Li ([jl@ium.cn](mailto:jl@ium.cn))

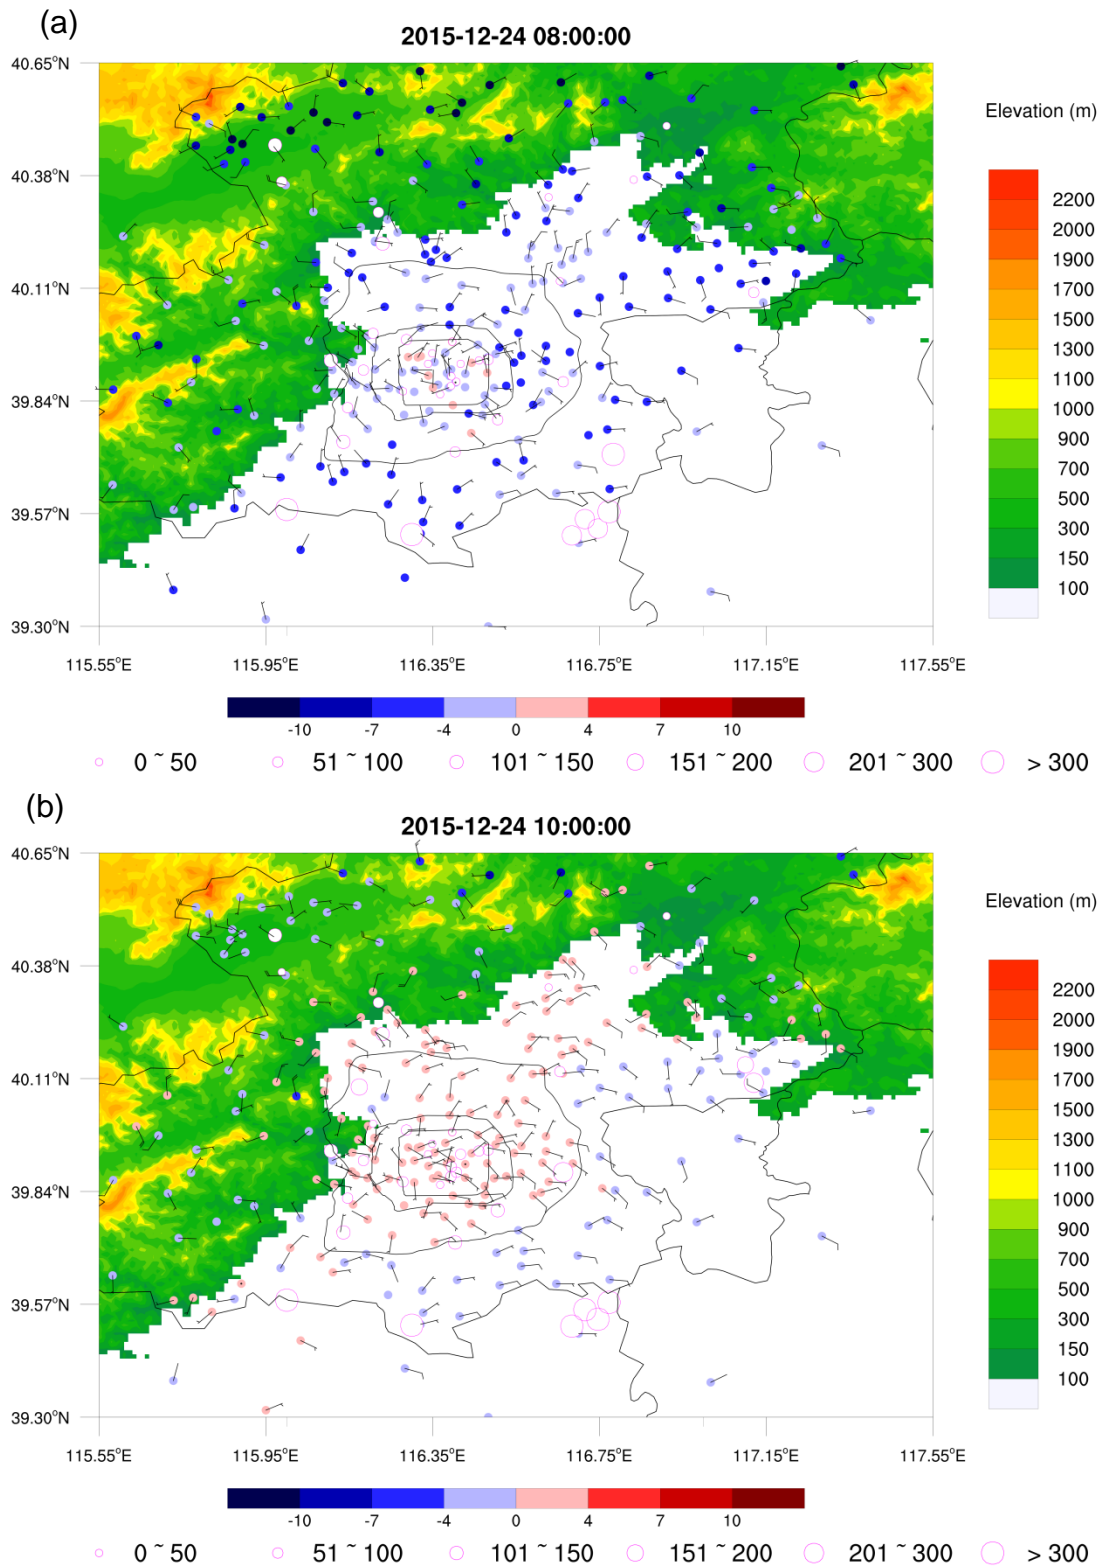

Fig S1. Temperature (color filled dots coded according to the bottom color bar), wind vectors (2 m s<sup>-1</sup> is one full bar) and PM<sub>2.5</sub> concentrations (purple circles; the size of the circle represents concentration values) in the plain area within and around Beijing at (a) 08:00 LST and (b) 10:00 LST.

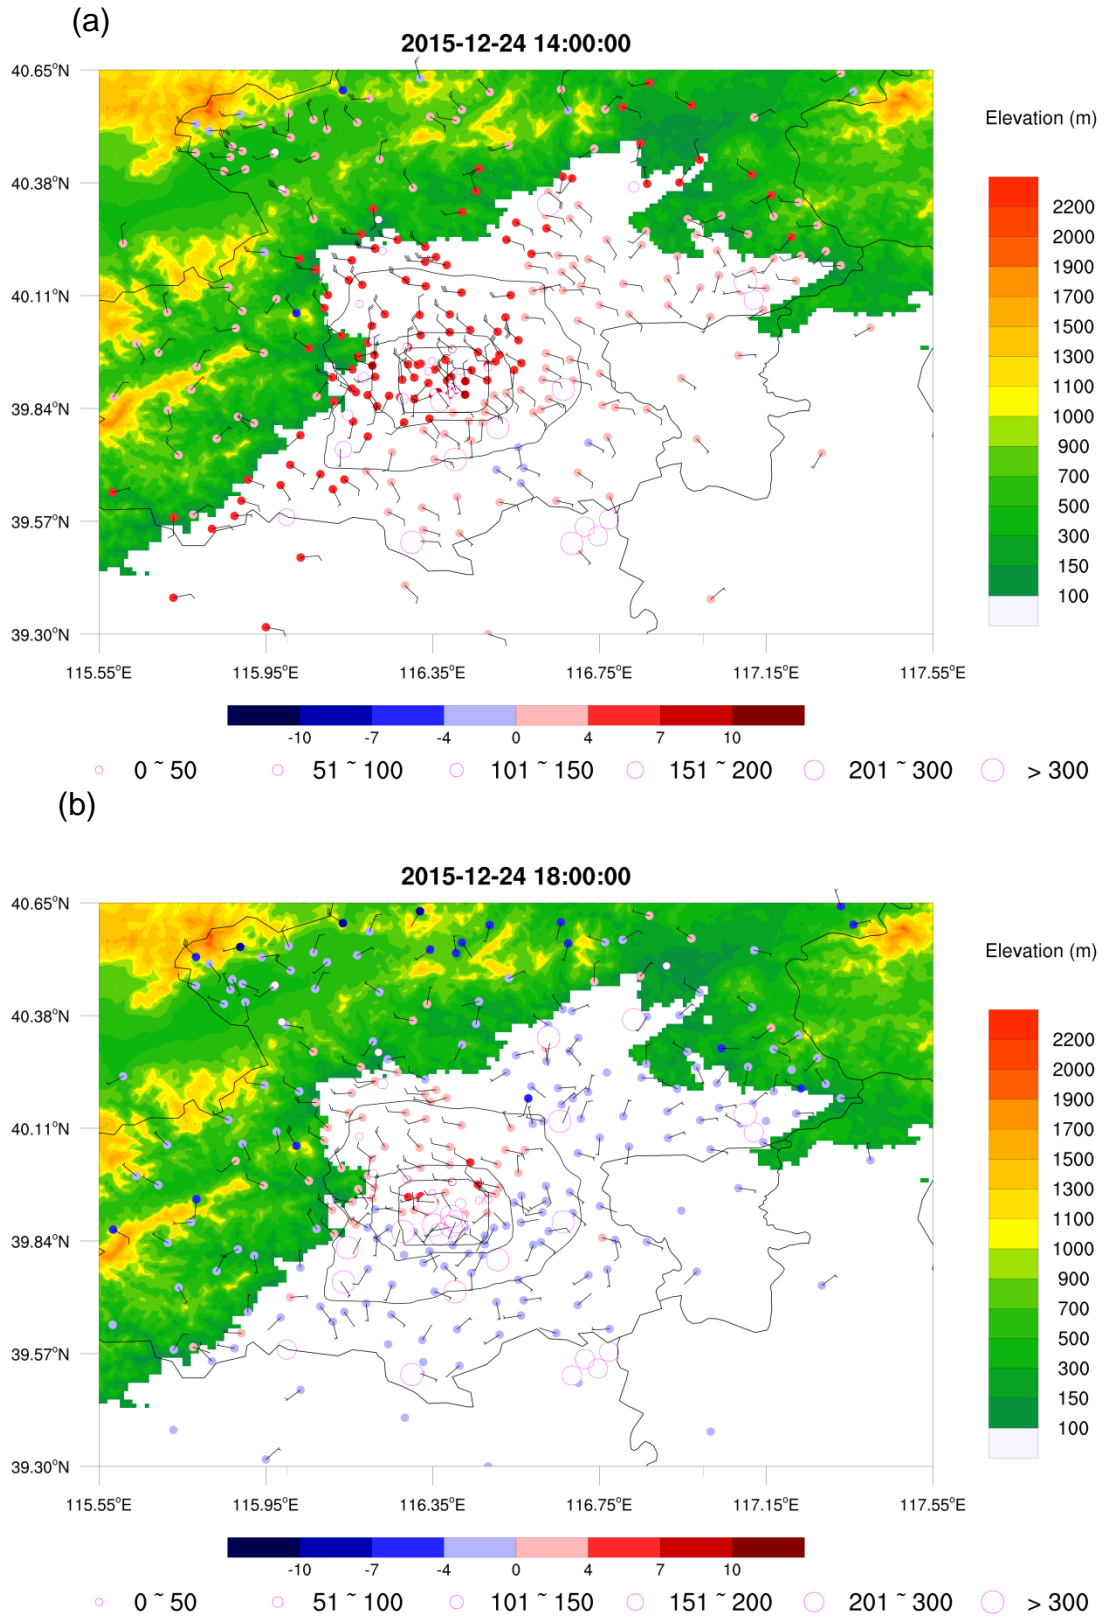

Fig S2. Same as Fig S1, but at (a) 14:00 LST and (b) 18:00 LST.

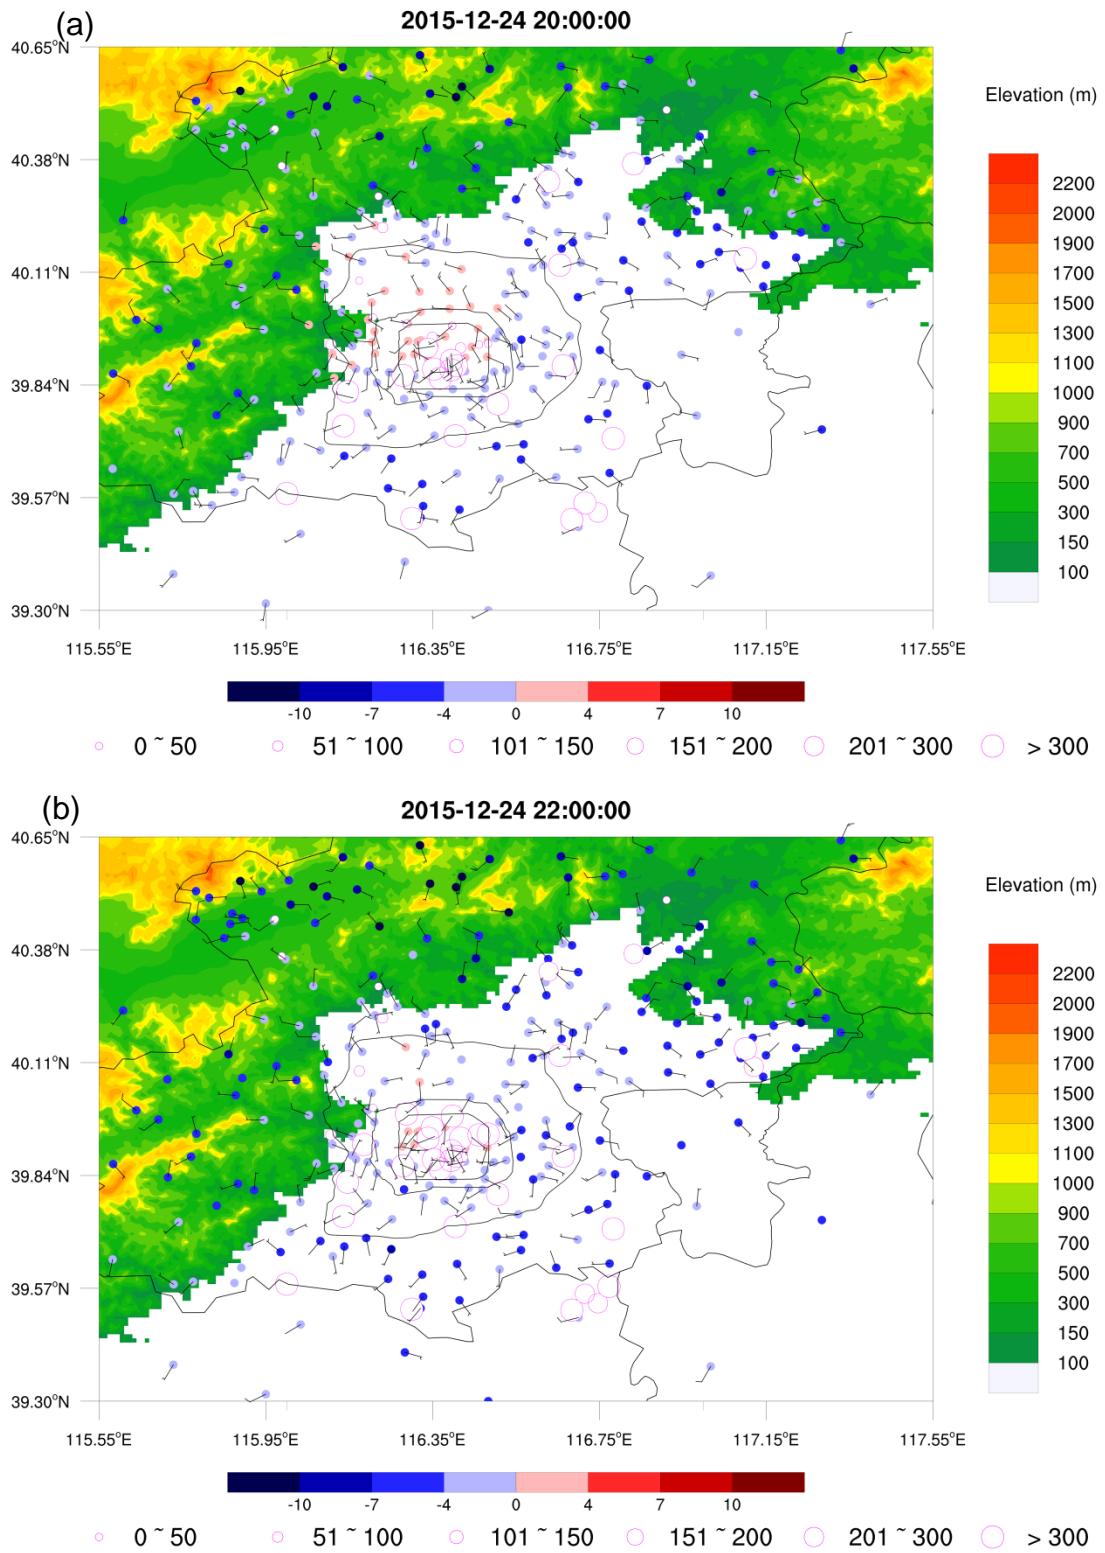

Fig S3. Same as Fig S1, but at (a) 20:00 LST and (b) 22:00 LST.

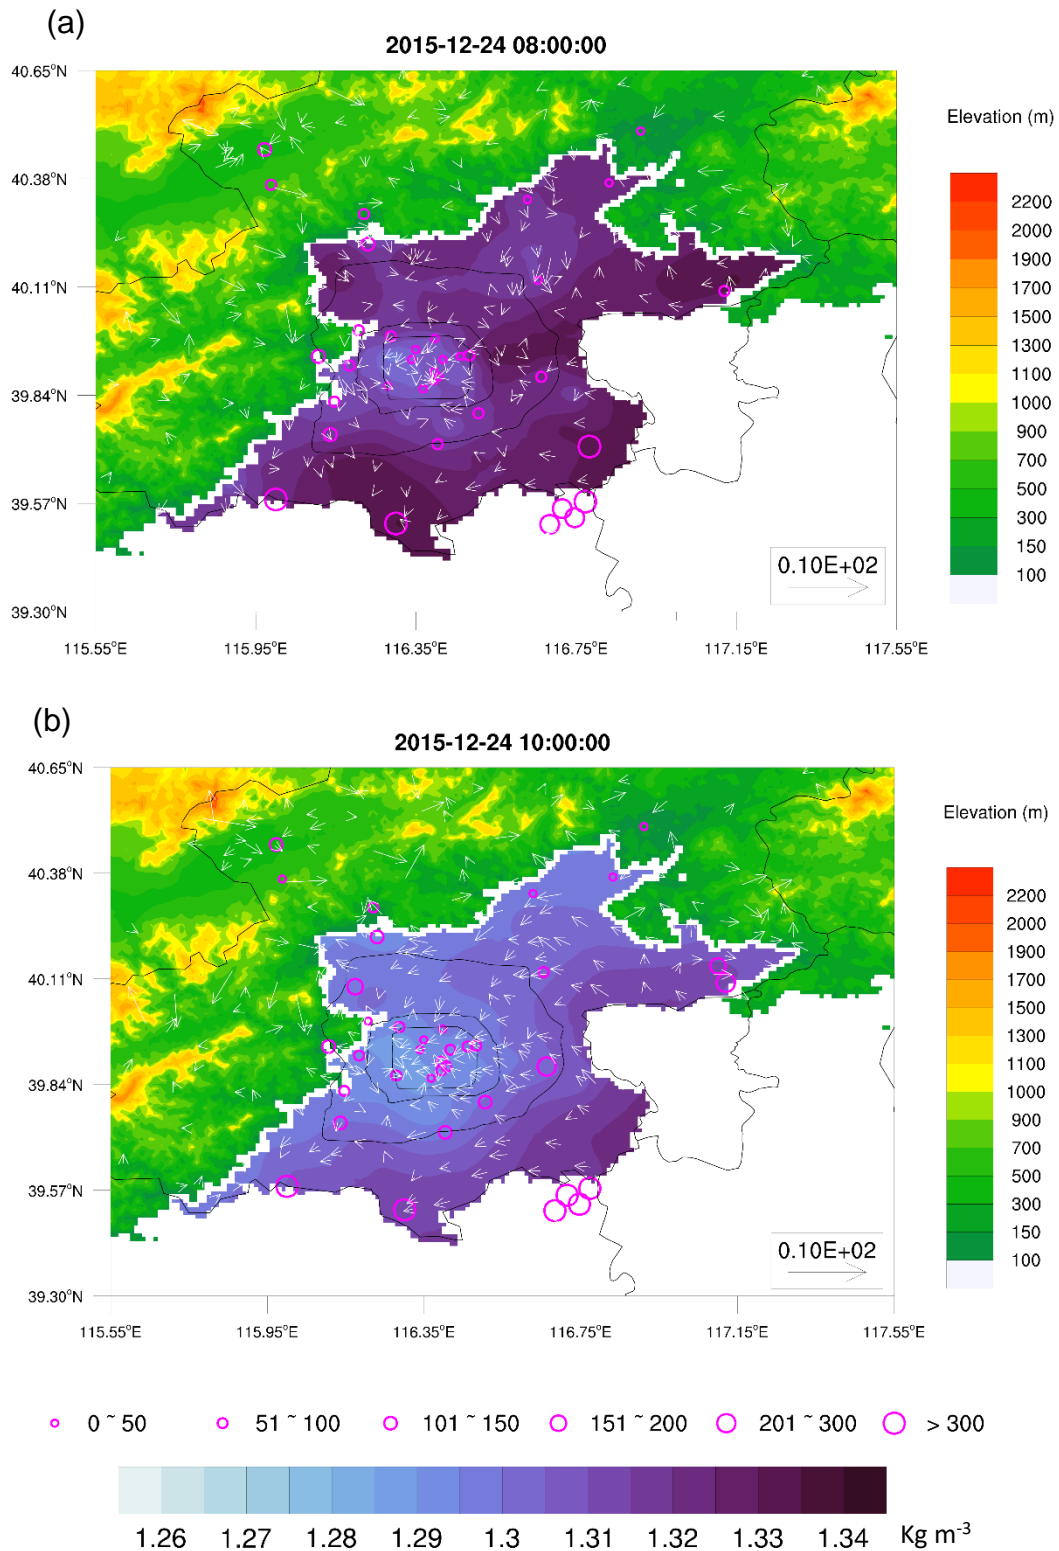

Fig S4. Air density (color filled contour map according to the bottom color bar), wind vectors ( $10 \text{ m s}^{-1}$  is one full arrow) and  $\text{PM}_{2.5}$  concentrations (purple circles; the size of the circle represents concentration values) in the plain area within and around Beijing at (a) 08:00 LST and (b) 10:00 LST.

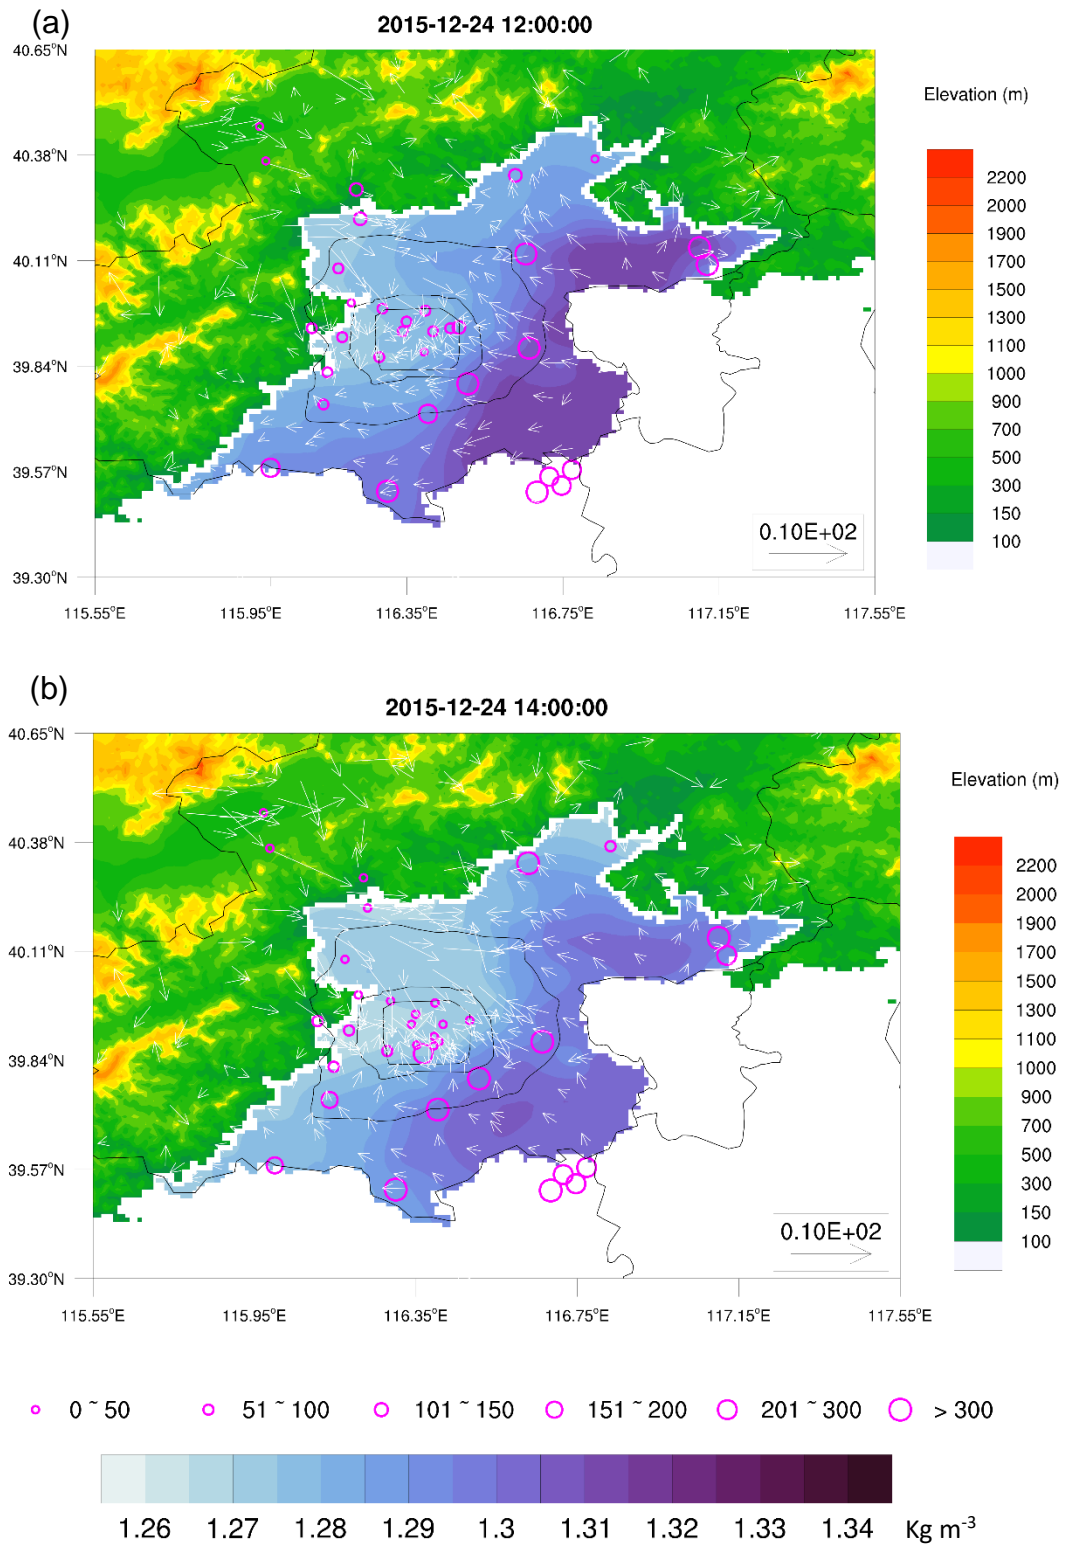

Fig S5. Same as Fig S4, but at (a) 12:00 LST and (b) 14:00 LST.

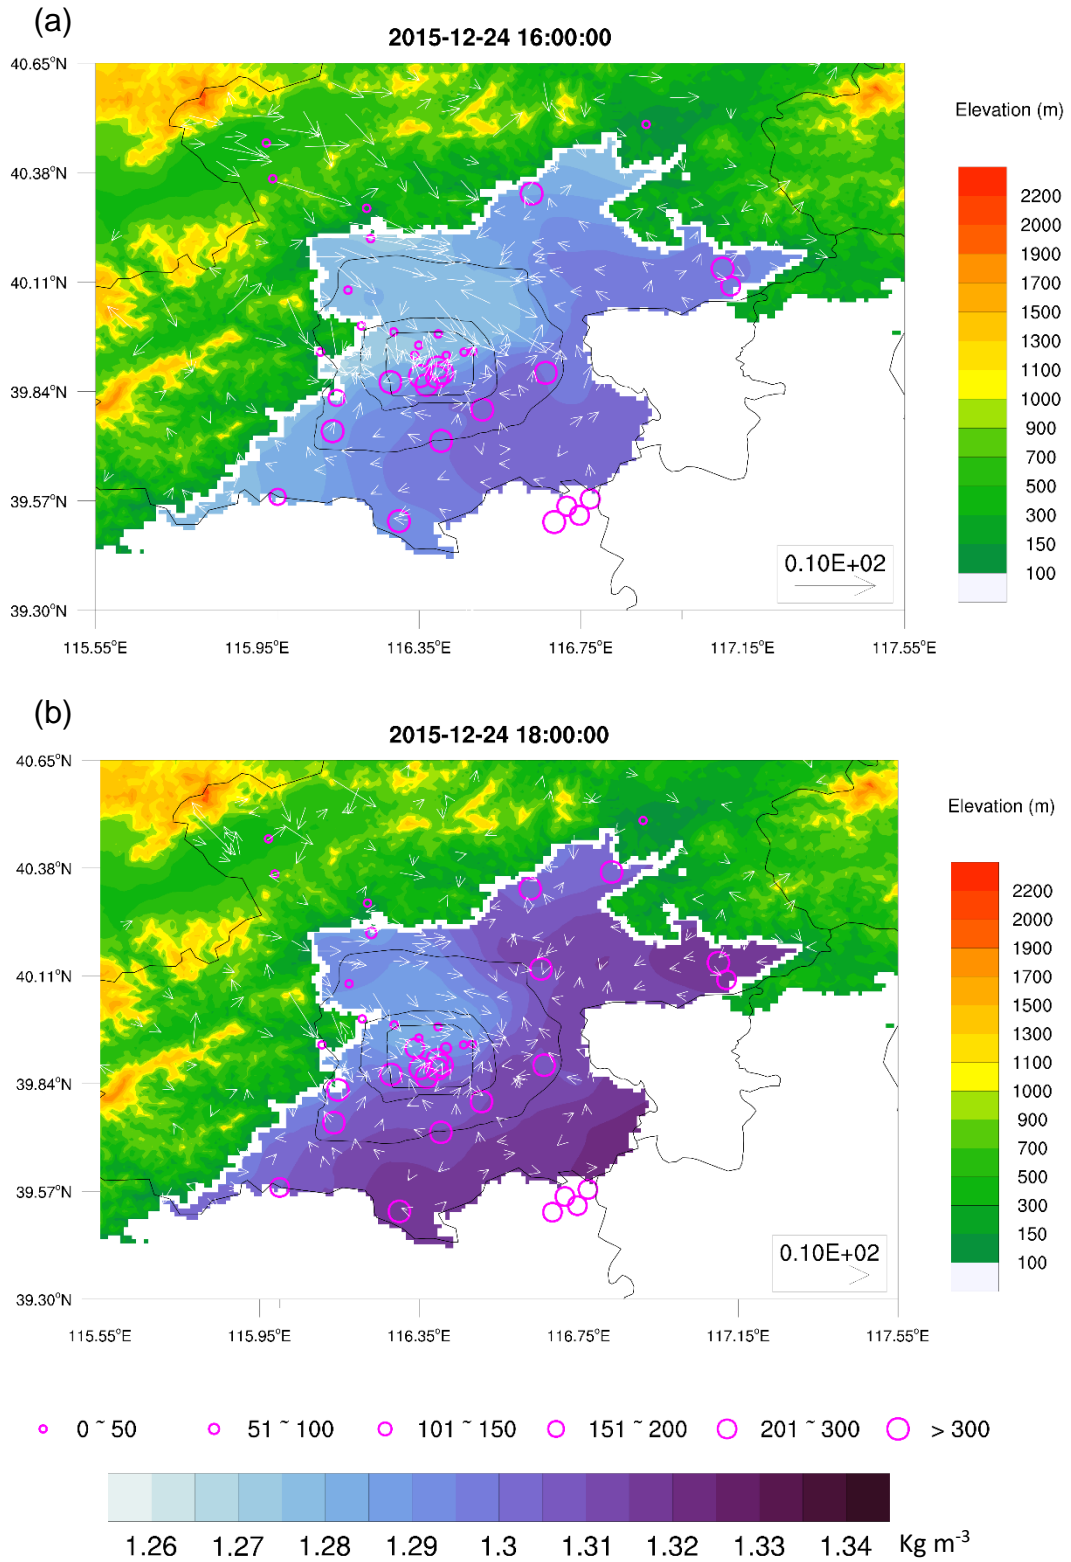

Fig S6. Same as Fig S4, but at (a) 16:00 LST and (b) 18:00 LST.

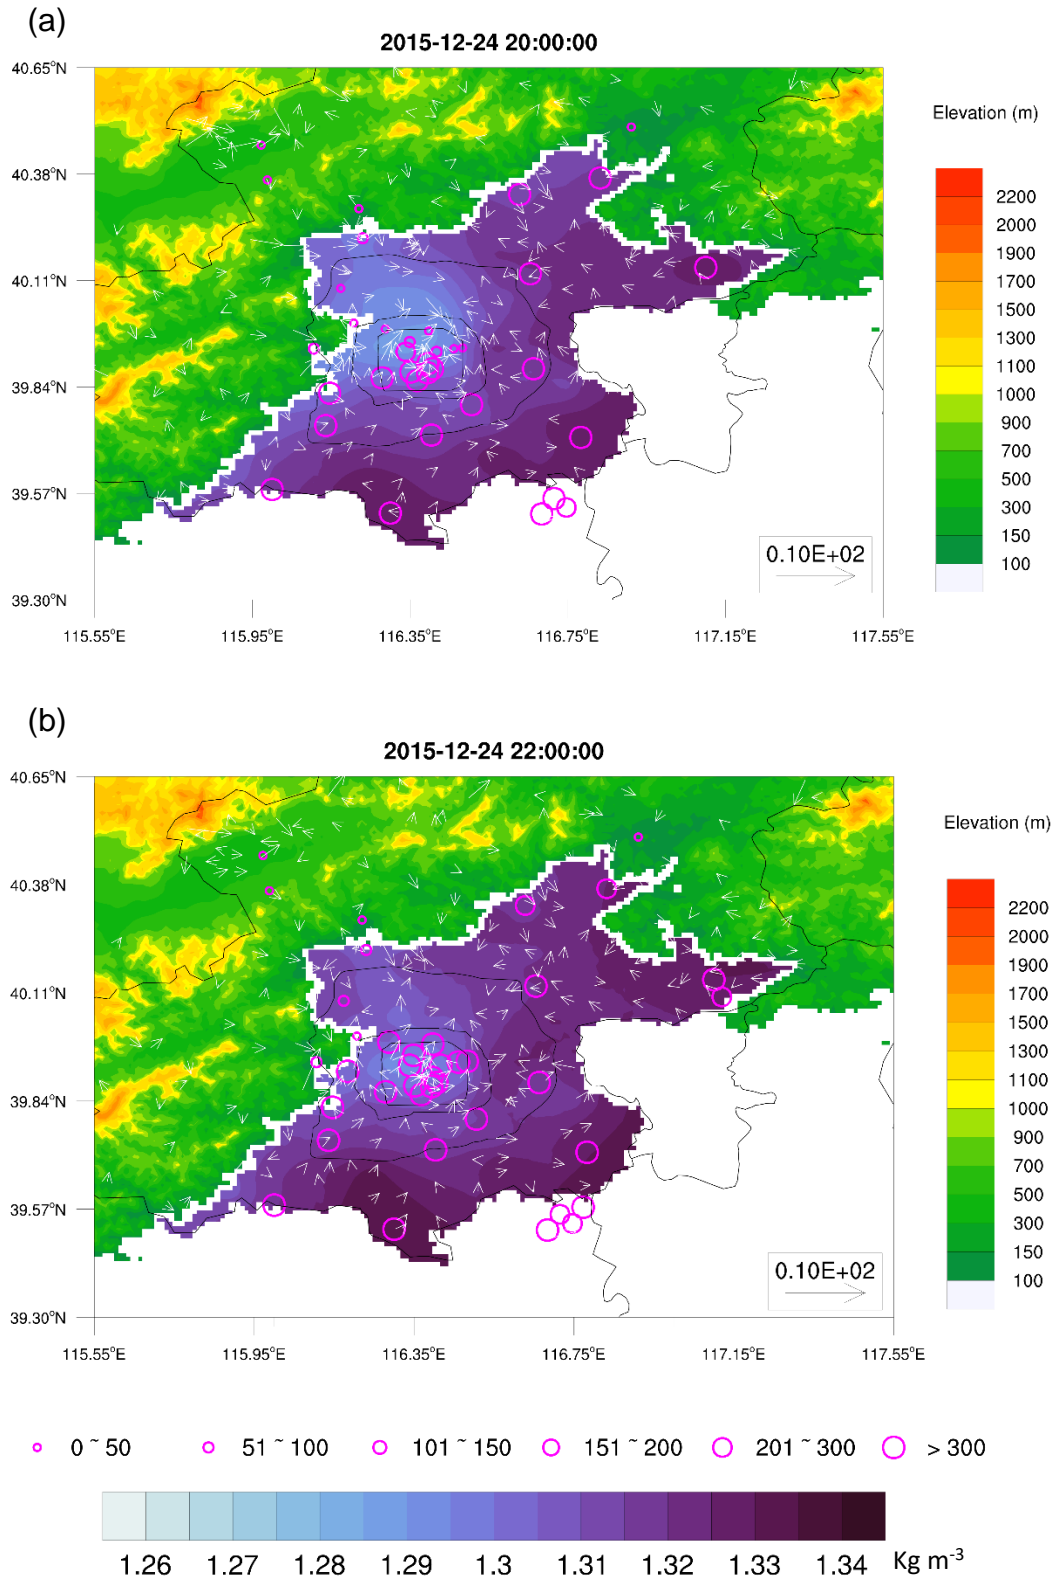

Fig S7. Same as Fig S4, but at (a) 20:00 LST and (b) 22:00 LST.
